# Supplementary material for: Hepatic Transcriptome Analysis Revealing the Molecular Pathogenesis of Type 2 Diabetes Mellitus in Zucker Diabetic Fatty Rats
Source: PubMed Central journal article supplement (PMC7732450; doi:10.3389/fendo.2020.565858), 2020-11-24
Supplement: DataSheet_1.pdf [file DataSheet_1.pdf]

## Supplementary Figure S1

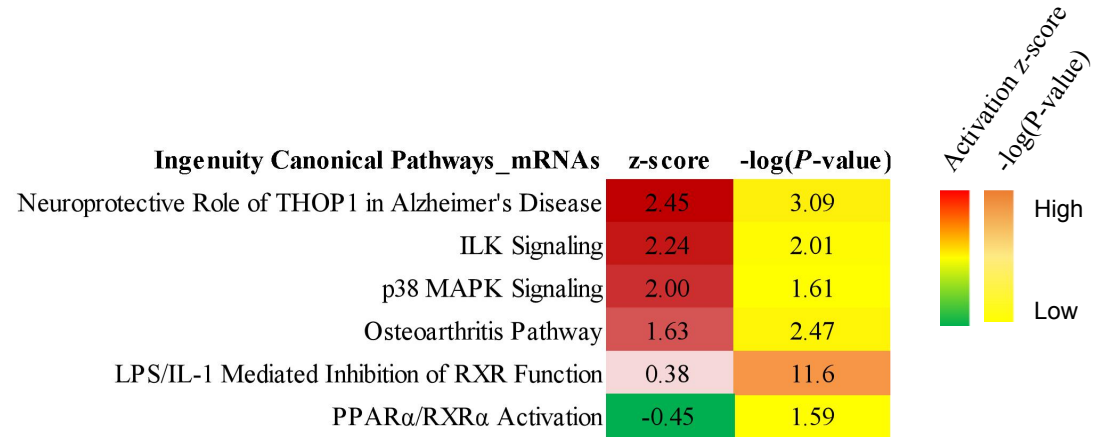

### Supplementary Figure S1 Significantly changed canonical pathways of the DEGs between ZDF and ZCL rats using IPA

The left color key represents the activation z-score ranging from low (green) to high (red) (z-score > 0, activation; z-score < 0, inhibition). The right color key indicates the significance ranging from low (yellow) to high (orange) ( $-\log(p\text{-value}) > 1.3$ ). The values of z-scores and  $-\log_{10}(p\text{-value})$  are shown in the cells.
